# Supplementary material for: Anillin is required for tumor growth and regulated by miR-15a/miR-16-1 in HBV-related hepatocellular carcinoma
Source: PubMed Central journal article supplement (PMC6128427; doi:10.18632/aging.101510), 2018-08-09
Supplement: aging-10-101510-s001.pdf [file aging-10-101510-s001.pdf]

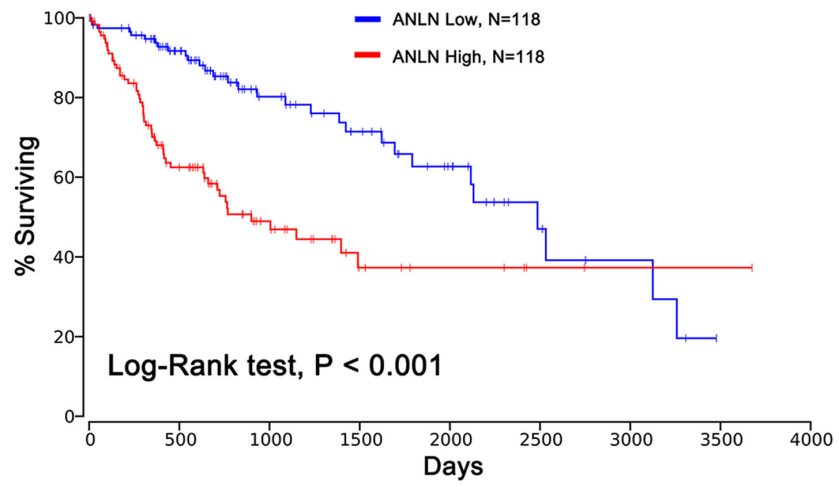

**Supplementary Figure 1. ANLN expression is associated with overall survival using OncoLnc survival data according to Kaplan-Meier analysis.**
